# Supplementary material
Source: PubMed Central journal article supplement (PMC10370475)
Supplement: NIHMS1914753-supplement-1.pdf [file NIHMS1914753-supplement-1.pdf]

## State-level Tobacco 21 policy variable coding

### Coding:

T21 variable applied at individual level using state, date, and age (to account for age of respondents for exemptions in selected states) (i.e., those who are legally allowed to purchase stay a '0')

0=T21 not implemented

1=T21 implemented for <1 year

2=T21 implemented 1-2 years

3=T21 implemented 3+ years

| State                     | REG_US     | Policy Effective Date    | W1 (Aug 2017) | W2 (Aug 2018)                   | W3 (Aug 2019)                   | W3.5 (Feb 2020)                 | W4 (Aug 2020) | W4.5 (Feb 2021) | W5 (Aug 2021) |
|---------------------------|------------|--------------------------|---------------|---------------------------------|---------------------------------|---------------------------------|---------------|-----------------|---------------|
| <b>Federal</b>            | <b>ALL</b> | <b>2019-12-20</b>        | <b>0</b>      | <b>0</b>                        | <b>0</b>                        | <b>1</b>                        | <b>1</b>      | <b>2</b>        | <b>2</b>      |
| Alabama (AL)              | 1          | 2021-08-01†; use federal | 0             | 0                               | 0                               | 1                               | 1             | 2               | 2             |
| Alaska                    | 2          | N/A; use federal         | 0             | 0                               | 0                               | 1                               | 1             | 2               | 2             |
| Arizona                   | 3          | N/A; use federal         | 0             | 0                               | 0                               | 1                               | 1             | 2               | 2             |
| Arkansas (AR)             | 4          | 2019-09-01*              | 0             | 0                               | 0                               | 1                               | 1             | 2               | 2             |
| California (CA)           | 5          | 2016-06-09               | 2             | 2                               | 3                               | 3                               | 3             | 3               | 3             |
| Colorado (CO)             | 6          | 2020-07-14; use federal  | 0             | 0                               | 0                               | 1                               | 1             | 2               | 2             |
| Connecticut (CT)          | 7          | 2019-10-01               | 0             | 0                               | 0                               | 1                               | 1             | 2               | 2             |
| Delaware (DE)             | 8          | 2019-07-16               | 0             | 0                               | 1                               | 1                               | 2             | 2               | 2             |
| District of Columbia (DC) | 9          | 2017-02-18†              | 1             | 2                               | 2                               | 2                               | 3             | 3               | 3             |
| Florida (FL)              | 10         | 2021-10-01†; use federal | 0             | 0                               | 0                               | 1                               | 1             | 2               | 2             |
| Georgia (GA)              | 11         | 2021-01-01†; use federal | 0             | 0                               | 0                               | 1                               | 1             | 2               | 2             |
| Hawaii (HI)               | 12         | 2016-01-01               | 2             | 2                               | 3                               | 3                               | 3             | 3               | 3             |
| Idaho                     | 13         | N/A; use federal         | 0             | 0                               | 0                               | 1                               | 1             | 2               | 2             |
| Illinois (IL)             | 14         | 2019-07-01               | 0             | 0                               | 1                               | 1                               | 2             | 2               | 2             |
| Indiana (IN)              | 15         | 2020-07-01; use federal  | 0             | 0                               | 0                               | 1                               | 1             | 2               | 2             |
| Iowa (IA)                 | 16         | 2020-06-29; use federal  | 0             | 0                               | 0                               | 1                               | 1             | 2               | 2             |
| Kansas                    | 17         | N/A; use federal         | 0             | 0                               | 0                               | 1                               | 1             | 2               | 2             |
| Kentucky (KY)             | 18         | 2021-01-01‡; use federal | 0             | 0                               | 0                               | 1                               | 1             | 2               | 2             |
| Louisiana (LA)            | 19         | 2021-08-01†; use federal | 0             | 0                               | 0                               | 1                               | 1             | 2               | 2             |
| Maine (ME)                | 20         | 2018-07-01*              | 0             | 0 (age 18/19);<br>1 (age 16/17) | 0 (age 19); 2<br>(age 16/17/18) | 2                               | 2             | 2               | 3             |
| Maryland (MD)             | 21         | 2019-10-01               | 0             | 0                               | 0                               | 1                               | 1             | 2               | 2             |
| Massachusetts (MA)        | 22         | 2018-12-31*              | 0             | 0                               | 0 (age 18/19); 1<br>(age 16/17) | 1 (age 19); 2<br>(age 16/17/18) | 2             | 2               | 2             |
| Michigan                  | 23         | N/A; use federal         | 0             | 0                               | 0                               | 1                               | 1             | 2               | 2             |
| Minnesota (MN)            | 24         | 2020-08-01; use federal  | 0             | 0                               | 0                               | 1                               | 1             | 2               | 2             |
| Mississippi (MS)          | 25         | 2020-07-08; use federal  | 0             | 0                               | 0                               | 1                               | 1             | 2               | 2             |
| Missouri                  | 26         | N/A; use federal         | 0             | 0                               | 0                               | 1                               | 1             | 2               | 2             |
| Montana                   | 27         | N/A; use federal         | 0             | 0                               | 0                               | 1                               | 1             | 2               | 2             |
| Nebraska (NE)             | 28         | 2020-10-01†; use federal | 0             | 0                               | 0                               | 1                               | 1             | 2               | 2             |
| Nevada (NV)               | 29         | 2021-05-27†; use federal | 0             | 0                               | 0                               | 1                               | 1             | 2               | 2             |
| New Hampshire (NH)        | 30         | 2020-07-29†; use federal | 0             | 0                               | 0                               | 1                               | 1             | 2               | 2             |
| New Jersey (NJ)           | 31         | 2017-11-01               | 0             | 1                               | 2                               | 2                               | 2             | 3               | 3             |
| New Mexico (NM)           | 32         | 2021-01-01; use federal  | 0             | 0                               | 0                               | 1                               | 1             | 2               | 2             |
| New York (NY)             | 33         | 2019-11-13               | 0             | 0                               | 0                               | 1                               | 1             | 2               | 2             |
| North Carolina            | 34         | N/A; use federal         | 0             | 0                               | 0                               | 1                               | 1             | 2               | 2             |
| North Dakota (ND)         | 35         | 2021-08-01†; use federal | 0             | 0                               | 0                               | 1                               | 1             | 2               | 2             |
| Ohio (OH)                 | 36         | 2019-10-17               | 0             | 0                               | 0                               | 1                               | 1             | 2               | 2             |
| Oklahoma (OK)             | 37         | 2020-05-19; use federal  | 0             | 0                               | 0                               | 1                               | 1             | 2               | 2             |
| Oregon (OR)               | 38         | 2018-01-01               | 0             | 1                               | 2                               | 2                               | 2             | 3               | 3             |
| Pennsylvania (PA)         | 39         | 2020-07-01; use federal  | 0             | 0                               | 0                               | 1                               | 1             | 2               | 2             |
| Rhode Island (RI)         | 40         | 2021-07-07†; use federal | 0             | 0                               | 0                               | 1                               | 1             | 2               | 2             |
| South Carolina            | 41         | N/A; use federal         | 0             | 0                               | 0                               | 1                               | 1             | 2               | 2             |
| South Dakota (SD)         | 42         | 2020-07-01; use federal  | 0             | 0                               | 0                               | 1                               | 1             | 2               | 2             |
| Tennessee (TN)            | 43         | 2021-01-01; use federal  | 0             | 0                               | 0                               | 1                               | 1             | 2               | 2             |
| Texas (TX)                | 44         | 2019-09-01*              | 0             | 0                               | 0                               | 1                               | 1             | 2               | 2             |
| Utah (UT)                 | 45         | 2020-07-01; use federal  | 0             | 0                               | 0                               | 1                               | 1             | 2               | 2             |
| Vermont (VT)              | 46         | 2019-09-01               | 0             | 0                               | 0                               | 1                               | 1             | 2               | 2             |
| Virginia (VA)             | 47         | 2019-07-01               | 0             | 0                               | 1                               | 1                               | 2             | 2               | 2             |
| Washington (WA)           | 48         | 2020-01-01; use federal  | 0             | 0                               | 0                               | 1                               | 1             | 2               | 2             |
| West Virginia             | 49         | N/A; use federal         | 0             | 0                               | 0                               | 1                               | 1             | 2               | 2             |
| Wisconsin                 | 50         | N/A; use federal         | 0             | 0                               | 0                               | 1                               | 1             | 2               | 2             |
| Wyoming (WY)              | 51         | 2020-07-01; use federal  | 0             | 0                               | 0                               | 1                               | 1             | 2               | 2             |

### \*With a phase-in period

Arkansas: phase-in exempts US Military members between 18–20 and individuals born on or has attained 19 years of age as of December 31, 2019

(<https://www.arkleg.state.ar.us/Acts/Document?type=pdf&act=580&ddBienniumSession=2019%2F2019R>)

Maine: phase-in for those born on or before 1 July 2000 (<http://www.mainelegislature.org/legis/statutes/22/title22sec1555-B.html>)

Massachusetts: phase-in State law exempts individuals born on or before 30 December 2000 (<https://www.mass.gov/info-details/massachusetts-law-about-smoking>)

Texas: exemption for military and those born before August 31, 2001 (<https://pdnhf.org/news/e-cigarette-use-particularly-by-youth-is-rapidly-increasing>)

### Sources:

Unless otherwise noted, state-level T21 data obtained from Campaign for Tobacco Free Kids

([https://www.tobaccofreekids.org/assets/content/what\\_we\\_do/state\\_local\\_issues/sales\\_21/states\\_localities\\_MLSA\\_21.pdf](https://www.tobaccofreekids.org/assets/content/what_we_do/state_local_issues/sales_21/states_localities_MLSA_21.pdf))

†State-level T21 date from <https://tobacco21.org>

‡ Legislation passed in Senate March 26, 2020 says "EFFECTIVE January 1, 2021" in the legislation summary (<https://apps.legislature.ky.gov/record/20RS/sb56.html>)

(<https://legiscan.com/KY/bill/SB56/2020>)

### NOTES:

- Prior to federal T21 implementation, MLA for cigarettes was 18, although Alabama, Alaska and Utah had state-level MLA of 19 (CDC, 2018)

- New Jersey had state-level MLA of 19 until 21 was implemented as of November 1, 2017 (<https://www.pbs.org/newshour/nation/new-jersey-may-become-second-state-to-raise-smoking-age-to-21>)

- MLA for e-cigarettes was the same as cigarettes, except in Michigan and Pennsylvania, where there was no state-level provision for e-cigarettes (CDC, 2018)

### Reference:

US Department of Health and Human Services, Centers for Disease Control. STATE System Tobacco 21 Fact Sheet: Minimum Legal Age for Purchasing Tobacco Products by Location. In effect as of September 30, 2018. (<https://chronicdata.cdc.gov/download/873a-af74/application%2Fpdf>)

**State-level cannabis legalization policy variable coding**

**Coding:**

0=Not legal

1=Medical legal

2=Medical and non-medical legal

| STATE          | REG_US | Medical legal | Non-medical legal | W1 (Aug 2017) | W2 (Aug 2018) | W3 (Aug 2019) | W3.5 (Feb 2020) | W4 (Aug 2020) | W4.5 (Feb 2021) | W5 (Aug 2021) |
|----------------|--------|---------------|-------------------|---------------|---------------|---------------|-----------------|---------------|-----------------|---------------|
| Alabama        | 1      | 2021 (May)    | N/A               | 0             | 0             | 0             | 0               | 0             | 0               | 1             |
| Alaska         | 2      | 1998          | 2015 (Feb)        | 2             | 2             | 2             | 2               | 2             | 2               | 2             |
| Arizona        | 3      | 2010          | 2020 (Nov)        | 1             | 1             | 1             | 1               | 1             | 2               | 2             |
| Arkansas       | 4      | 2016          | N/A               | 1             | 1             | 1             | 1               | 1             | 1               | 1             |
| California     | 5      | 1996          | 2016 (Nov)        | 2             | 2             | 2             | 2               | 2             | 2               | 2             |
| Colorado       | 6      | 2001          | 2012 (Dec)        | 2             | 2             | 2             | 2               | 2             | 2               | 2             |
| Connecticut    | 7      | 2012          | 2021 (Jul)        | 1             | 1             | 1             | 1               | 1             | 1               | 2             |
| Delaware       | 8      | 2011          | N/A               | 1             | 1             | 1             | 1               | 1             | 1               | 1             |
| DC             | 9      | 2010          | 2015 (Feb)        | 2             | 2             | 2             | 2               | 2             | 2               | 2             |
| Florida        | 10     | 2016          | N/A               | 1             | 1             | 1             | 1               | 1             | 1               | 1             |
| Georgia        | 11     | N/A           | N/A               | 0             | 0             | 0             | 0               | 0             | 0               | 0             |
| Hawaii         | 12     | 2000          | N/A               | 1             | 1             | 1             | 1               | 1             | 1               | 1             |
| Idaho          | 13     | N/A           | N/A               | 0             | 0             | 0             | 0               | 0             | 0               | 0             |
| Illinois       | 14     | 2013          | 2020 (Jan)        | 1             | 1             | 1             | 2               | 2             | 2               | 2             |
| Indiana        | 15     | N/A           | N/A               | 0             | 0             | 0             | 0               | 0             | 0               | 0             |
| Iowa           | 16     | N/A           | N/A               | 0             | 0             | 0             | 0               | 0             | 0               | 0             |
| Kansas         | 17     | N/A           | N/A               | 0             | 0             | 0             | 0               | 0             | 0               | 0             |
| Kentucky       | 18     | N/A           | N/A               | 0             | 0             | 0             | 0               | 0             | 0               | 0             |
| Louisiana      | 19     | 2016          | N/A               | 1             | 1             | 1             | 1               | 1             | 1               | 1             |
| Maine          | 20     | 1999          | 2017 (Jan)        | 2             | 2             | 2             | 2               | 2             | 2               | 2             |
| Maryland       | 21     | 2014          | N/A               | 1             | 1             | 1             | 1               | 1             | 1               | 1             |
| Massachusetts  | 22     | 2013          | 2016 (Dec)        | 2             | 2             | 2             | 2               | 2             | 2               | 2             |
| Michigan       | 23     | 2008          | 2018 (Dec)        | 1             | 1             | 2             | 2               | 2             | 2               | 2             |
| Minnesota      | 24     | 2014          | N/A               | 1             | 1             | 1             | 1               | 1             | 1               | 1             |
| Mississippi    | 25     | N/A           | N/A               | 0             | 0             | 0             | 0               | 0             | 0               | 0             |
| Missouri       | 26     | 2018 (Dec)    | N/A               | 0             | 0             | 1             | 1               | 1             | 1               | 1             |
| Montana        | 27     | 2004          | 2021 (Jan)        | 1             | 1             | 1             | 1               | 1             | 2               | 2             |
| Nebraska       | 28     | N/A           | N/A               | 0             | 0             | 0             | 0               | 0             | 0               | 0             |
| Nevada         | 29     | 2001          | 2017 (Jan)        | 2             | 2             | 2             | 2               | 2             | 2               | 2             |
| New Hampshire  | 30     | 2013          | N/A               | 1             | 1             | 1             | 1               | 1             | 1               | 1             |
| New Jersey     | 31     | 2010          | 2021 (Jan)        | 1             | 1             | 1             | 1               | 1             | 2               | 2             |
| New Mexico     | 32     | 2007          | 2021 (Jun)        | 1             | 1             | 1             | 1               | 1             | 1               | 2             |
| New York       | 33     | 2014          | 2021 (Mar)        | 1             | 1             | 1             | 1               | 1             | 1               | 2             |
| North Carolina | 34     | N/A           | N/A               | 0             | 0             | 0             | 0               | 0             | 0               | 0             |
| North Dakota   | 35     | 2016          | N/A               | 1             | 1             | 1             | 1               | 1             | 1               | 1             |
| Ohio           | 36     | 2016          | N/A               | 1             | 1             | 1             | 1               | 1             | 1               | 1             |
| Oklahoma       | 37     | 2018 (June)   | N/A               | 0             | 1             | 1             | 1               | 1             | 1               | 1             |
| Oregon         | 38     | 1998          | 2015 (Jul)        | 2             | 2             | 2             | 2               | 2             | 2               | 2             |
| Pennsylvania   | 39     | 2016          | N/A               | 1             | 1             | 1             | 1               | 1             | 1               | 1             |
| Rhode Island   | 40     | 2006          | N/A               | 1             | 1             | 1             | 1               | 1             | 1               | 1             |
| South Carolina | 41     | N/A           | N/A               | 0             | 0             | 0             | 0               | 0             | 0               | 0             |
| South Dakota   | 42     | 2021 (Aug)    | N/A               | 0             | 0             | 0             | 0               | 0             | 0               | 1             |
| Tennessee      | 43     | N/A           | N/A               | 0             | 0             | 0             | 0               | 0             | 0               | 0             |
| Texas          | 44     | N/A           | N/A               | 0             | 0             | 0             | 0               | 0             | 0               | 0             |
| Utah           | 45     | 2018 (Dec)    | N/A               | 0             | 0             | 1             | 1               | 1             | 1               | 1             |
| Vermont        | 46     | 2004          | 2018 (Jul)        | 1             | 2             | 2             | 2               | 2             | 2               | 2             |
| Virginia       | 47     | 2020 (Jul)    | 2021 (Jul)        | 0             | 0             | 0             | 0               | 1             | 1               | 2             |
| Washington     | 48     | 1998          | 2012 (Dec)        | 2             | 2             | 2             | 2               | 2             | 2               | 2             |
| West Virginia  | 49     | 2019 (Jul)    | N/A               | 0             | 0             | 1             | 1               | 1             | 1               | 1             |
| Wisconsin      | 50     | N/A           | N/A               | 0             | 0             | 0             | 0               | 0             | 0               | 0             |
| Wyoming        | 51     | N/A           | N/A               | 0             | 0             | 0             | 0               | 0             | 0               | 0             |

**Sources:**

National Conference of State Legislatures: <https://www.ncsl.org/research/health/state-medical-marijuana-laws.aspx>

ProCon: <https://medicalmarijuana.procon.org/legal-medical-marijuana-states-and-dc/> and

<https://marijuana.procon.org/legal-recreational-marijuana-states-and-dc/>

NORML: <https://norml.org/laws/>

## Provincial age of access for cigarettes

### Coding:

0=MLA 18

1=MLA 19

| Province                     | REG_CA     | Age       | Coding (all waves) |
|------------------------------|------------|-----------|--------------------|
| <b>CANADA (federal)</b>      | <b>ALL</b> | <b>18</b> | <b>0</b>           |
| Alberta (AB)                 | 1          | 18        | 0                  |
| British Columbia (BC)        | 2          | 19        | 1                  |
| Manitoba (MB)                | 3          | 18        | 0                  |
| New Brunswick (NB)           | 4          | 19        | 1                  |
| Newfoundland & Labrador (NL) | 5          | 19        | 1                  |
| Nova Scotia (NS)             | 7          | 19        | 1                  |
| Ontario (ON)                 | 9          | 19        | 1                  |
| Prince Edward Island (PEI)*  | 10         | 19*       | 1                  |
| Quebec (QC)                  | 11         | 18        | 0                  |
| Saskatchewan (SK)            | 12         | 18        | 0                  |

\*NOTE: PEI implemented a MLA of 21 for tobacco products on March 1, 2020, with a transition period exempting those who were already 19 years of age on that date

### Sources:

Government of Canada. Tobacco (Access) Regulations [SOR/99-93]. <https://laws.justice.gc.ca/PDF/SOR-99-93.pdf> (accessed 10 June 2021)

Ontario Tobacco Research Unit. September 2013. Youth Access to Tobacco Products: Monitoring Update. <https://otru.org/wp-content/uploads/2013/10/youth2013.pdf>

Government of Prince Edward Island. 2021. Vaping Laws.

<https://www.princeedwardisland.ca/en/information/health-and-wellness/vaping-laws> (accessed 10 June 2021)

Government of Alberta. 2022. Reducing smoking and vaping – rules and enforcement.

<https://www.alberta.ca/reducing-smoking-and-vaping-rules-and-enforcement.aspx> (accessed 14 April 2022)

**Provincial legalization and age of access for cannabis**

**Coding:**

0=Not legal  
 1=MLA 18  
 2=MLA 19  
 3=MLA 21

| Province                     | REG_CA     | Legal Date        | Age       | Policy Effective Date | Age | W1 (Aug 2017) | W2 (Aug 2018) | W3 (Aug 2019) | W3.5 (Feb 2020) | W4 (Aug 2020) | W4.5 (Feb 2021) | W5 (Aug 2021) |
|------------------------------|------------|-------------------|-----------|-----------------------|-----|---------------|---------------|---------------|-----------------|---------------|-----------------|---------------|
| <b>CANADA (federal)</b>      | <b>ALL</b> | <b>2018-10-17</b> | <b>18</b> |                       |     | 0             | 0             | 1             | 1               | 1             | 1               | 1             |
| Alberta (AB)                 | 1          | 2018-10-17        | 18        |                       |     | 0             | 0             | 1             | 1               | 1             | 1               | 1             |
| British Columbia (BC)        | 2          | 2018-10-17        | 19        |                       |     | 0             | 0             | 2             | 2               | 2             | 2               | 2             |
| Manitoba (MB)                | 3          | 2018-10-17        | 19        |                       |     | 0             | 0             | 2             | 2               | 2             | 2               | 2             |
| New Brunswick (NB)           | 4          | 2018-10-17        | 19        |                       |     | 0             | 0             | 2             | 2               | 2             | 2               | 2             |
| Newfoundland & Labrador (NL) | 5          | 2018-10-17        | 19        |                       |     | 0             | 0             | 2             | 2               | 2             | 2               | 2             |
| Nova Scotia (NS)             | 7          | 2018-10-17        | 19        |                       |     | 0             | 0             | 2             | 2               | 2             | 2               | 2             |
| Ontario (ON)                 | 9          | 2018-10-17        | 19        |                       |     | 0             | 0             | 2             | 2               | 2             | 2               | 2             |
| Prince Edward Island (PEI)   | 10         | 2018-10-17        | 19        |                       |     | 0             | 0             | 2             | 2               | 2             | 2               | 2             |
| Quebec (QC)                  | 11         | 2018-10-17        | 18        | 2020-01-01            | 21  | 0             | 0             | 1             | 3               | 3             | 3               | 3             |
| Saskatchewan (SK)            | 12         | 2018-10-17        | 19        |                       |     | 0             | 0             | 2             | 2               | 2             | 2               | 2             |

**Source:**

<https://www.canada.ca/en/health-canada/services/drugs-medication/cannabis/laws-regulations/provinces-territories.html>
