# Supplementary material
Source: PubMed Central journal article supplement (PMC10370475)
Supplement: NIHMS1914753-supplement-2.pdf [file NIHMS1914753-supplement-2.pdf]

**SUPPLEMENTARY FIGURES AND TABLES**

**Supplemental Table S1: Perceived difficulty/ease of accessing substances among youth aged 16-19, by country, 2017-2021, weighted % (unweighted n)**

| <b>Substance</b>           | <b>Response</b>  | <b>2017-Aug</b> | <b>2018-Aug</b> | <b>2019-Aug</b> | <b>2020-Feb</b> | <b>2020-Aug</b> | <b>2021-Feb</b> | <b>2021-Aug</b> |        |
|----------------------------|------------------|-----------------|-----------------|-----------------|-----------------|-----------------|-----------------|-----------------|--------|
| <b>CANADA</b>              |                  | n=29,719        | n=4038          | n=3845          | n=4135          | n=4217          | n=4269          | n=4611          | n=4604 |
| <b>Cigarettes</b>          | Very difficult   | 10.0 (396)      | 11.9 (419)      | 14.8 (587)      | 14.0 (550)      | 13.3 (575)      | 13.0 (591)      | 13.7 (613)      |        |
|                            | Fairly difficult | 11.0 (430)      | 12.1 (424)      | 14.2 (572)      | 15.9 (611)      | 15.0 (656)      | 14.8 (692)      | 15.5 (694)      |        |
|                            | Fairly easy      | 28.6 (1156)     | 26.5 (974)      | 29.1 (1180)     | 27.7 (1164)     | 29.1 (1247)     | 29.8 (1338)     | 28.0 (1282)     |        |
|                            | Very easy        | 44.3 (1810)     | 42.0 (1760)     | 33.6 (1464)     | 34.3 (1563)     | 33.5 (1392)     | 31.9 (1496)     | 33.2 (1577)     |        |
|                            | Don't know       | 5.4 (219)       | 6.5 (234)       | 7.5 (296)       | 7.2 (289)       | 8.3 (364)       | 9.5 (449)       | 8.8 (398)       |        |
|                            | Refused          | 0.7 (27)        | 0.9 (34)        | 0.9 (36)        | 0.9 (40)        | 0.8 (35)        | 1.0 (45)        | 0.7 (40)        |        |
| <b>E-cigarettes</b>        | Very difficult   | 7.2 (286)       | 8.2 (292)       | 9.9 (386)       | 8.9 (343)       | 9.3 (401)       | 9.3 (421)       | 10.9 (473)      |        |
|                            | Fairly difficult | 12.0 (494)      | 11.4 (432)      | 9.4 (398)       | 11.2 (454)      | 11.9 (521)      | 11.7 (537)      | 12.9 (568)      |        |
|                            | Fairly easy      | 31.4 (1277)     | 29.6 (1113)     | 33.0 (1348)     | 29.7 (1248)     | 32.2 (1374)     | 31.9 (1466)     | 29.6 (1367)     |        |
|                            | Very easy        | 40.9 (1636)     | 41.0 (1648)     | 39.5 (1677)     | 42.5 (1848)     | 37.1 (1557)     | 36.6 (1713)     | 36.3 (1728)     |        |
|                            | Don't know       | 7.9 (322)       | 9.0 (325)       | 7.6 (298)       | 7.0 (288)       | 8.7 (383)       | 9.4 (431)       | 9.5 (423)       |        |
|                            | Refused          | 0.5 (23)        | 0.9 (35)        | 0.7 (28)        | 0.7 (36)        | 0.7 (33)        | 1.0 (43)        | 0.8 (45)        |        |
| <b>Alcohol</b>             | Very difficult   | 6.3 (234)       | 7.9 (284)       | 9.6 (378)       | 9.1 (357)       | 8.9 (377)       | 8.9 (385)       | 10.1 (431)      |        |
|                            | Fairly difficult | 9.7 (360)       | 11.2 (402)      | 12.6 (508)      | 12.2 (502)      | 12.4 (531)      | 11.2 (497)      | 11.0 (484)      |        |
|                            | Fairly easy      | 27.7 (1081)     | 25.7 (959)      | 28.1 (1161)     | 26.7 (1113)     | 28.8 (1243)     | 28.1 (1263)     | 26.9 (1217)     |        |
|                            | Very easy        | 52.2 (2201)     | 49.1 (1977)     | 43.4 (1837)     | 46.1 (2002)     | 43.5 (1840)     | 44.8 (2155)     | 45.3 (2174)     |        |
|                            | Don't know       | 3.5 (137)       | 5.4 (196)       | 5.7 (226)       | 5.2 (209)       | 5.6 (246)       | 6.1 (274)       | 5.9 (260)       |        |
|                            | Refused          | 0.6 (25)        | 0.7 (27)        | 0.7 (25)        | 0.7 (34)        | 0.7 (32)        | 0.9 (37)        | 0.7 (38)        |        |
| <b>Cannabis</b>            | Very difficult   | 15.6 (617)      | 16.7 (596)      | 16.8 (648)      | 16.6 (601)      | 17.1 (731)      | 16.6 (750)      | 17.7 (791)      |        |
|                            | Fairly difficult | 19.7 (788)      | 20.6 (766)      | 17.6 (672)      | 16.1 (636)      | 16.6 (700)      | 17.4 (791)      | 18.8 (845)      |        |
|                            | Fairly easy      | 29.5 (1232)     | 27.1 (1061)     | 27.3 (1149)     | 26.5 (1126)     | 29.1 (1242)     | 26.9 (1241)     | 25.8 (1210)     |        |
|                            | Very easy        | 24.3 (967)      | 24.0 (997)      | 28.3 (1268)     | 31.4 (1467)     | 26.2 (1125)     | 27.5 (1287)     | 1241 (1262)     |        |
|                            | Don't know       | 10.1 (406)      | 10.5 (389)      | 9.1 (358)       | 8.7 (347)       | 10.2 (435)      | 10.8 (497)      | 9.7 (445)       |        |
|                            | Refused          | 0.7 (28)        | 1.0 (36)        | 0.9 (40)        | 0.9 (40)        | 0.8 (36)        | 0.9 (45)        | 1.0 (51)        |        |
| <b>Painkillers/opiates</b> | Very difficult   | 29.0 (1159)     | 32.5 (1212)     | 31.3 (1253)     | 31.3 (1262)     | 32.9 (1412)     | 33.2 (1544)     | 34.4 (1579)     |        |
|                            | Fairly difficult | 22.1 (914)      | 23.0 (885)      | 21.2 (892)      | 21.6 (910)      | 20.0 (843)      | 19.7 (888)      | 20.6 (947)      |        |
|                            | Fairly easy      | 19.0 (777)      | 16.0 (621)      | 17.8 (743)      | 16.0 (705)      | 14.6 (628)      | 14.1 (656)      | 14.3 (653)      |        |
|                            | Very easy        | 10.3 (421)      | 8.7 (368)       | 9.0 (394)       | 10.2 (458)      | 7.8 (336)       | 8.5 (382)       | 9.1 (413)       |        |
|                            | Don't know       | 18.6 (725)      | 18.5 (706)      | 19.4 (800)      | 19.4 (816)      | 23.5 (1002)     | 23.3 (1074)     | 20.3 (943)      |        |
|                            | Refused          | 1.1 (42)        | 1.3 (53)        | 1.2 (53)        | 1.3 (66)        | 1.2 (48)        | 1.3 (67)        | 1.3 (69)        |        |
| <b>Ecstasy/MDMA</b>        | Very difficult   | 36.4 (1523)     | 38.4 (1402)     | 38.6 (1546)     | 36.8 (1453)     | 36.6 (1598)     | 37.5 (1738)     | 39.7 (1795)     |        |
|                            | Fairly difficult | 20.1 (841)      | 20.3 (802)      | 19.6 (814)      | 19.5 (874)      | 19.4 (799)      | 18.3 (843)      | 19.2 (905)      |        |
|                            | Fairly easy      | 13.2 (501)      | 11.6 (471)      | 11.3 (499)      | 11.4 (519)      | 10.9 (461)      | 11.0 (502)      | 10.1 (466)      |        |
|                            | Very easy        | 6.5 (229)       | 6.0 (263)       | 6.0 (265)       | 7.8 (341)       | 5.3 (226)       | 6.0 (264)       | 5.6 (249)       |        |
|                            | Don't know       | 22.7 (896)      | 21.8 (830)      | 23.1 (953)      | 23.1 (960)      | 26.6 (1134)     | 25.8 (1191)     | 24.0 (1113)     |        |
|                            | Refused          | 1.2 (48)        | 1.8 (77)        | 1.3 (58)        | 1.4 (70)        | 1.2 (51)        | 1.5 (73)        | 1.4 (76)        |        |
| <b>Hallucinogens</b>       | Very difficult   | 38.9 (1612)     | 40.9 (1484)     | 40.6 (1612)     | 37.6 (1480)     | 37.5 (1617)     | 37.0 (1771)     | 40.9 (1838)     |        |
|                            | Fairly difficult | 19.0 (789)      | 19.6 (779)      | 18.7 (789)      | 18.5 (809)      | 19.4 (809)      | 16.1 (804)      | 18.4 (859)      |        |
|                            | Fairly easy      | 12.8 (504)      | 11.0 (452)      | 11.5 (505)      | 12.5 (605)      | 10.8 (474)      | 10.7 (552)      | 11.3 (540)      |        |
|                            | Very easy        | 6.1 (221)       | 5.8 (251)       | 5.7 (266)       | 8.1 (344)       | 5.4 (225)       | 5.5 (288)       | 5.5 (253)       |        |
|                            | Don't know       | 21.8 (864)      | 20.9 (798)      | 22.0 (902)      | 21.9 (906)      | 25.5 (1089)     | 23.2 (1124)     | 22.6 (1040)     |        |
|                            | Refused          | 1.3 (48)        | 1.9 (81)        | 1.4 (61)        | 1.5 (73)        | 1.4 (55)        | 1.0 (72)        | 1.4 (74)        |        |

| <b>ENGLAND</b>             | n=28,541         | n=3995      | n=3874      | n=3493      | n=4275      | n=4290      | n=4298      | n=4316      |
|----------------------------|------------------|-------------|-------------|-------------|-------------|-------------|-------------|-------------|
| <b>Cigarettes</b>          | Very difficult   | 7.1 (254)   | 8.1 (247)   | 8.8 (296)   | 9.9 (421)   | 10.4 (435)  | 11.1 (507)  | 12.1 (512)  |
|                            | Fairly difficult | 10.1 (372)  | 11.0 (323)  | 13.0 (438)  | 13.0 (544)  | 13.4 (538)  | 13.5 (622)  | 13.6 (581)  |
|                            | Fairly easy      | 25.1 (947)  | 22.7 (780)  | 28.8 (990)  | 28.6 (1185) | 28.2 (1198) | 29.4 (1285) | 30.4 (1267) |
|                            | Very easy        | 53.4 (2263) | 52.7 (2352) | 43.5 (1559) | 42.2 (1842) | 40.5 (1780) | 38.3 (1529) | 36.1 (1609) |
|                            | Don't know       | 3.7 (136)   | 5.1 (159)   | 5.7 (200)   | 5.8 (257)   | 7.1 (315)   | 7.2 (328)   | 7.1 (320)   |
|                            | Refused          | 0.6 (23)    | 0.4 (13)    | 0.2 (10)    | 0.5 (26)    | 0.5 (24)    | 0.5 (27)    | 0.6 (27)    |
| <b>E-cigarettes</b>        | Very difficult   | 4.6 (164)   | 5.1 (159)   | 6.3 (210)   | 6.3 (279)   | 8.3 (347)   | 8.5 (395)   | 8.9 (376)   |
|                            | Fairly difficult | 9.8 (363)   | 10.2 (320)  | 12.0 (411)  | 12.4 (517)  | 14.1 (566)  | 13.0 (593)  | 13.1 (546)  |
|                            | Fairly easy      | 29.2 (1162) | 28.8 (1076) | 31.8 (1126) | 30.9 (1315) | 30.5 (1322) | 32.3 (1428) | 32.1 (1380) |
|                            | Very easy        | 50.7 (2089) | 48.8 (2092) | 43.6 (1527) | 43.0 (1829) | 38.5 (1670) | 37.5 (1475) | 37.0 (1632) |
|                            | Don't know       | 5.2 (193)   | 6.8 (216)   | 6.0 (206)   | 6.8 (305)   | 8.1 (359)   | 8.2 (377)   | 8.2 (354)   |
|                            | Refused          | 0.6 (24)    | 0.3 (11)    | 0.3 (13)    | 0.6 (30)    | 0.5 (26)    | 0.6 (30)    | 0.7 (28)    |
| <b>Alcohol</b>             | Very difficult   | 5.1 (179)   | 4.9 (145)   | 7.0 (236)   | 7.1 (303)   | 7.7 (326)   | 9.0 (388)   | 9.5 (397)   |
|                            | Fairly difficult | 8.3 (302)   | 8.0 (241)   | 10.1 (340)  | 11.5 (491)  | 11.5 (449)  | 11.0 (488)  | 11.8 (503)  |
|                            | Fairly easy      | 22.7 (831)  | 22.2 (686)  | 26.2 (878)  | 26.2 (1079) | 25.8 (1067) | 26.8 (1173) | 26.6 (1080) |
|                            | Very easy        | 60.8 (2567) | 60.7 (2671) | 52.2 (1876) | 49.4 (2147) | 49.0 (2180) | 47.4 (1974) | 45.7 (2046) |
|                            | Don't know       | 2.6 (96)    | 3.8 (119)   | 4.2 (152)   | 5.3 (226)   | 5.4 (244)   | 5.4 (249)   | 5.8 (263)   |
|                            | Refused          | 0.5 (20)    | 0.4 (12)    | 0.3 (11)    | 0.5 (29)    | 0.5 (24)    | 0.5 (26)    | 0.6 (27)    |
| <b>Cannabis</b>            | Very difficult   | 23.2 (891)  | 22.2 (784)  | 24.6 (845)  | 22.9 (959)  | 25.9 (1076) | 25.5 (1106) | 27.7 (1154) |
|                            | Fairly difficult | 25.0 (1032) | 25.2 (1029) | 25.2 (896)  | 21.5 (909)  | 22.6 (1014) | 21.8 (928)  | 23.8 (1025) |
|                            | Fairly easy      | 26.8 (1101) | 27.6 (1183) | 25.3 (884)  | 25.9 (1104) | 22.8 (976)  | 24.1 (1025) | 20.6 (912)  |
|                            | Very easy        | 12.8 (498)  | 13.3 (484)  | 13.3 (467)  | 16.5 (726)  | 13.6 (575)  | 14.8 (635)  | 13.1 (584)  |
|                            | Don't know       | 11.5 (441)  | 11.1 (373)  | 11.0 (380)  | 12.3 (526)  | 14.2 (603)  | 13.0 (561)  | 13.9 (593)  |
|                            | Refused          | 0.8 (32)    | 0.6 (21)    | 0.5 (21)    | 1.0 (51)    | 0.8 (46)    | 0.8 (43)    | 1.0 (48)    |
| <b>Painkillers/opiates</b> | Very difficult   | 25.3 (996)  | 28.5 (1116) | 29.9 (1023) | 26.3 (1086) | 28.7 (1193) | 29.8 (1244) | 30.5 (1262) |
|                            | Fairly difficult | 23.5 (950)  | 25.0 (987)  | 22.6 (770)  | 21.7 (915)  | 21.2 (921)  | 20.2 (867)  | 20.8 (920)  |
|                            | Fairly easy      | 21.2 (867)  | 19.3 (808)  | 20.1 (713)  | 20.2 (888)  | 18.4 (815)  | 19.1 (840)  | 18.3 (797)  |
|                            | Very easy        | 14.6 (582)  | 10.9 (408)  | 10.6 (405)  | 12.7 (564)  | 11.2 (490)  | 11.7 (502)  | 10.6 (502)  |
|                            | Don't know       | 14.6 (566)  | 15.8 (536)  | 16.1 (554)  | 18.1 (769)  | 19.8 (835)  | 18.0 (785)  | 18.7 (784)  |
|                            | Refused          | 0.9 (34)    | 0.6 (19)    | 0.7 (28)    | 1.0 (53)    | 0.6 (36)    | 1.1 (60)    | 1.1 (51)    |
| <b>Ecstasy/MDMA</b>        | Very difficult   | 40.1 (1598) | 37.8 (1457) | 41.1 (1413) | 35.1 (1469) | 39.3 (1697) | 39.3 (1709) | 42.7 (1803) |
|                            | Fairly difficult | 22.5 (921)  | 22.1 (934)  | 21.6 (756)  | 19.8 (832)  | 19.3 (829)  | 19.6 (826)  | 18.9 (839)  |
|                            | Fairly easy      | 14.9 (599)  | 16.2 (665)  | 14.0 (493)  | 16.9 (722)  | 12.6 (540)  | 13.3 (553)  | 11.8 (504)  |
|                            | Very easy        | 5.3 (214)   | 6.2 (215)   | 5.7 (205)   | 7.7 (343)   | 6.3 (254)   | 6.1 (256)   | 4.6 (211)   |
|                            | Don't know       | 16.2 (624)  | 17.0 (575)  | 16.7 (594)  | 19.4 (846)  | 21.6 (922)  | 20.5 (885)  | 20.7 (894)  |
|                            | Refused          | 1.0 (39)    | 0.7 (28)    | 0.8 (32)    | 1.2 (63)    | 0.9 (48)    | 1.3 (69)    | 1.3 (65)    |
| <b>Hallucinogens</b>       | Very difficult   | 45.2 (1807) | 42.4 (1656) | 45.2 (1558) | 38.9 (1645) | 42.7 (1848) | 42.2 (1830) | 45.2 (1909) |
|                            | Fairly difficult | 22.3 (914)  | 23.1 (977)  | 20.9 (734)  | 19.9 (839)  | 19.0 (811)  | 19.6 (821)  | 18.3 (815)  |
|                            | Fairly easy      | 10.9 (431)  | 11.7 (470)  | 11.4 (403)  | 13.9 (589)  | 10.6 (451)  | 10.6 (458)  | 10.0 (446)  |
|                            | Very easy        | 4.1 (165)   | 4.6 (154)   | 4.3 (158)   | 6.5 (283)   | 5.7 (224)   | 5.7 (234)   | 4.5 (196)   |
|                            | Don't know       | 16.4 (634)  | 17.2 (581)  | 17.2 (598)  | 19.5 (852)  | 21.0 (901)  | 20.4 (880)  | 20.7 (887)  |
|                            | Refused          | 1.1 (44)    | 1.0 (36)    | 1.0 (42)    | 1.3 (67)    | 1.0 (55)    | 1.5 (75)    | 1.2 (63)    |
| <b>USA</b>                 | n=33,387         | n=4095      | n=4034      | n=3981      | n=5132      | n=5991      | n=5273      | n=4881      |
| <b>Cigarettes</b>          | Very difficult   | 11.1 (438)  | 14.6 (592)  | 14.7 (624)  | 16.4 (871)  | 19.4 (1282) | 22.5 (1264) | 19.9 (991)  |
|                            | Fairly difficult | 9.8 (389)   | 11.0 (462)  | 13.0 (503)  | 15.3 (785)  | 19.5 (1153) | 19.6 (999)  | 20.3 (973)  |
|                            | Fairly easy      | 27.1 (1082) | 24.3 (985)  | 27.5 (993)  | 29.2 (1480) | 29.4 (1667) | 25.9 (1329) | 27.7 (1280) |
|                            | Very easy        | 45.2 (1911) | 42.2 (1663) | 37.1 (1519) | 30.0 (1524) | 21.8 (1248) | 20.9 (1020) | 19.6 (999)  |

|                            |                  |             |             |             |             |             |             |             |
|----------------------------|------------------|-------------|-------------|-------------|-------------|-------------|-------------|-------------|
|                            | Don't know       | 6.0 (240)   | 7.3 (307)   | 7.0 (310)   | 8.2 (417)   | 8.8 (569)   | 9.5 (570)   | 11.1 (557)  |
|                            | Refused          | 0.8 (35)    | 0.7 (25)    | 0.7 (32)    | 1.0 (55)    | 1.1 (72)    | 1.7 (91)    | 1.3 (81)    |
| <b>E-cigarettes</b>        | Very difficult   | 9.2 (360)   | 9.3 (403)   | 9.9 (426)   | 10.6 (567)  | 13.5 (868)  | 16.5 (911)  | 13.7 (697)  |
|                            | Fairly difficult | 10.5 (425)  | 11.8 (460)  | 10.8 (435)  | 12.2 (612)  | 15.0 (946)  | 15.9 (793)  | 14.9 (717)  |
|                            | Fairly easy      | 28.6 (1161) | 25.6 (1062) | 27.3 (1061) | 30.4 (1580) | 33.5 (1947) | 29.5 (1563) | 32.1 (1545) |
|                            | Very easy        | 43.3 (1811) | 43.9 (1708) | 44.6 (1732) | 38.3 (1936) | 28.4 (1616) | 27.5 (1398) | 27.9 (1351) |
|                            | Don't know       | 7.7 (305)   | 8.8 (375)   | 6.7 (291)   | 7.5 (387)   | 8.6 (541)   | 8.8 (519)   | 9.9 (493)   |
|                            | Refused          | 0.7 (33)    | 0.6 (26)    | 0.8 (36)    | 1.0 (50)    | 1.1 (73)    | 1.7 (89)    | 1.4 (78)    |
| <b>Alcohol</b>             | Very difficult   | 13.7 (560)  | 15.5 (623)  | 17.8 (754)  | 14.2 (763)  | 15.8 (977)  | 17.2 (901)  | 16.0 (798)  |
|                            | Fairly difficult | 17.9 (747)  | 17.6 (718)  | 17.8 (741)  | 17.1 (822)  | 18.0 (1081) | 18.5 (950)  | 18.7 (885)  |
|                            | Fairly easy      | 32.5 (1343) | 30.3 (1216) | 30.7 (1142) | 31.0 (1586) | 29.8 (1758) | 28.7 (1485) | 26.9 (1313) |
|                            | Very easy        | 29.5 (1201) | 29.3 (1174) | 26.9 (1048) | 30.2 (1587) | 27.9 (1659) | 26.2 (1399) | 27.7 (1375) |
|                            | Don't know       | 5.5 (212)   | 6.7 (280)   | 6.1 (265)   | 6.4 (323)   | 7.4 (452)   | 7.7 (456)   | 9.1 (432)   |
|                            | Refused          | 0.8 (32)    | 0.6 (23)    | 0.7 (31)    | 1.0 (51)    | 1.1 (64)    | 1.7 (82)    | 1.6 (78)    |
| <b>Cannabis</b>            | Very difficult   | 19.8 (795)  | 20.5 (825)  | 20.7 (792)  | 17.1 (858)  | 22.5 (1343) | 25.3 (1289) | 23.2 (1082) |
|                            | Fairly difficult | 17.4 (733)  | 19.1 (750)  | 17.0 (648)  | 16.1 (779)  | 19.4 (1109) | 18.6 (906)  | 20.6 (939)  |
|                            | Fairly easy      | 27.9 (1147) | 24.5 (1010) | 25.8 (996)  | 26.6 (1360) | 24.9 (1526) | 22.1 (1192) | 23.5 (1116) |
|                            | Very easy        | 25.0 (1029) | 25.0 (1012) | 27.2 (1161) | 29.9 (1627) | 22.3 (1365) | 21.5 (1198) | 19.9 (1106) |
|                            | Don't know       | 8.8 (351)   | 10.0 (406)  | 8.7 (350)   | 9.3 (457)   | 9.7 (577)   | 10.7 (593)  | 11.2 (560)  |
|                            | Refused          | 1.0 (40)    | 0.9 (31)    | 0.8 (34)    | 0.9 (51)    | 1.1 (71)    | 1.9 (95)    | 1.6 (78)    |
| <b>Painkillers/opiates</b> | Very difficult   | 29.8 (1225) | 31.0 (1242) | 31.9 (1259) | 31.3 (1583) | 36.1 (2150) | 36.3 (1835) | 35.7 (1674) |
|                            | Fairly difficult | 18.5 (773)  | 18.6 (751)  | 19.1 (706)  | 19.5 (991)  | 18.6 (1116) | 18.8 (963)  | 18.1 (860)  |
|                            | Fairly easy      | 19.8 (805)  | 18.7 (753)  | 18.6 (734)  | 18.4 (934)  | 15.6 (952)  | 16.2 (849)  | 16.7 (805)  |
|                            | Very easy        | 13.8 (555)  | 12.6 (525)  | 12.1 (498)  | 11.8 (631)  | 9.9 (605)   | 9.6 (556)   | 9.6 (527)   |
|                            | Don't know       | 16.6 (677)  | 17.9 (720)  | 17.2 (726)  | 17.8 (916)  | 18.0 (1063) | 16.8 (948)  | 17.9 (909)  |
|                            | Refused          | 1.5 (60)    | 1.2 (43)    | 1.1 (58)    | 1.2 (77)    | 1.8 (105)   | 2.3 (122)   | 2.0 (106)   |
| <b>Ecstasy/MDMA</b>        | Very difficult   | 39.7 (1642) | 39.3 (1604) | 39.7 (1563) | 37.9 (1926) | 44.6 (2670) | 44.8 (2318) | 44.6 (2133) |
|                            | Fairly difficult | 18.5 (766)  | 17.5 (727)  | 17.0 (634)  | 18.9 (960)  | 17.4 (1030) | 17.9 (911)  | 17.7 (849)  |
|                            | Fairly easy      | 11.3 (460)  | 11.2 (432)  | 12.0 (464)  | 10.7 (554)  | 8.3 (495)   | 8.4 (454)   | 8.0 (391)   |
|                            | Very easy        | 6.7 (263)   | 7.9 (305)   | 7.4 (339)   | 7.6 (403)   | 5.9 (330)   | 5.3 (267)   | 5.4 (263)   |
|                            | Don't know       | 22.3 (901)  | 22.9 (925)  | 22.8 (918)  | 23.7 (1207) | 22.3 (1363) | 21.3 (1198) | 22.6 (1140) |
|                            | Refused          | 1.4 (63)    | 1.2 (41)    | 1.1 (63)    | 1.3 (82)    | 1.6 (103)   | 2.3 (125)   | 1.7 (105)   |
| <b>Hallucinogens</b>       | Very difficult   | 42.3 (1735) | 40.5 (1675) | 41.5 (1629) | 38.9 (1987) | 45.4 (2699) | 45.2 (2337) | 45.4 (2142) |
|                            | Fairly difficult | 17.3 (713)  | 18.1 (725)  | 16.5 (623)  | 18.7 (924)  | 16.7 (996)  | 17.2 (852)  | 17.3 (844)  |
|                            | Fairly easy      | 10.9 (452)  | 10.9 (419)  | 11.4 (446)  | 11.2 (591)  | 8.8 (550)   | 9.6 (522)   | 9.3 (468)   |
|                            | Very easy        | 6.5 (261)   | 7.1 (280)   | 7.5 (326)   | 7.7 (427)   | 6.2 (370)   | 6.0 (327)   | 5.6 (295)   |
|                            | Don't know       | 21.5 (863)  | 22.0 (881)  | 21.8 (886)  | 22.0 (1109) | 20.9 (1270) | 19.5 (1093) | 20.6 (1024) |
|                            | Refused          | 1.6 (71)    | 1.4 (54)    | 1.3 (71)    | 1.5 (94)    | 1.8 (106)   | 2.6 (142)   | 1.8 (108)   |

**Supplemental Table S2: Estimates from separate generalized estimating equations models (for each country) for very/fairly easy access to each substance, comparing substances within each country using a repeated measures approach, 2021<sub>Aug/Sept</sub>**

|                    |                                       | CANADA                    |        | ENGLAND                   |        | US                        |        |
|--------------------|---------------------------------------|---------------------------|--------|---------------------------|--------|---------------------------|--------|
|                    |                                       | AOR (95% CI) <sup>a</sup> | p      | AOR (95% CI) <sup>a</sup> | p      | AOR (95% CI) <sup>a</sup> | p      |
| Cigarettes         | vs. E-cigarettes                      | 0.81 (0.76-0.86)          | <.0001 | 0.88 (0.83-0.94)          | <.0001 | 0.59 (0.54-0.63)          | <.0001 |
| Cigarettes         | vs. Alcohol                           | 0.59 (0.55-0.64)          | <.0001 | 0.75 (0.70-0.81)          | <.0001 | 0.74 (0.67-0.81)          | <.0001 |
| Cigarettes         | vs. Marijuana/cannabis                | 1.43 (1.33-1.53)          | <.0001 | 4.06 (3.71-4.43)          | <.0001 | 1.17 (1.07-1.29)          | 0.0006 |
| Cigarettes         | vs. Ecstasy/MDMA                      | 8.93 (8.07-9.89)          | <.0001 | 10.49 (9.39-11.71)        | <.0001 | 5.93 (5.22-6.74)          | <.0001 |
| Cigarettes         | vs. Hallucinogens                     | 8.27 (7.49-9.14)          | <.0001 | 12.17 (10.86-13.63)       | <.0001 | 5.27 (4.66-5.96)          | <.0001 |
| Cigarettes         | vs. Prescription pain killers/opiates | 5.42 (4.93-5.95)          | <.0001 | 5.05 (4.59-5.57)          | <.0001 | 2.54 (2.28-2.83)          | <.0001 |
| E-cigarettes       | vs. Alcohol                           | 0.73 (0.68-0.78)          | <.0001 | 0.85 (0.79-0.92)          | <.0001 | 1.26 (1.15-1.38)          | <.0001 |
| E-cigarettes       | vs. Marijuana/cannabis                | 1.76 (1.65-1.89)          | <.0001 | 4.60 (4.20-5.04)          | <.0001 | 2.00 (1.83-2.18)          | <.0001 |
| E-cigarettes       | vs. Ecstasy/MDMA                      | 11.01 (9.93-12.22)        | <.0001 | 11.89 (10.63-13.30)       | <.0001 | 10.09 (8.83-11.53)        | <.0001 |
| E-cigarettes       | vs. Hallucinogens                     | 10.19 (9.23-11.26)        | <.0001 | 13.79 (12.28-15.49)       | <.0001 | 8.97 (7.90-10.18)         | <.0001 |
| E-cigarettes       | vs. Prescription pain killers/opiates | 6.68 (6.08-7.33)          | <.0001 | 5.73 (5.19-6.33)          | <.0001 | 4.33 (3.87-4.83)          | <.0001 |
| Alcohol            | vs. Marijuana/cannabis                | 2.42 (2.25-2.60)          | <.0001 | 5.39 (4.92-5.90)          | <.0001 | 1.58 (1.45-1.73)          | <.0001 |
| Alcohol            | vs. Ecstasy/MDMA                      | 15.10 (13.54-16.85)       | <.0001 | 13.93 (12.42-15.63)       | <.0001 | 8.00 (6.99-9.17)          | <.0001 |
| Alcohol            | vs. Hallucinogens                     | 13.98 (12.59-15.53)       | <.0001 | 16.16 (14.37-18.17)       | <.0001 | 7.11 (6.24-8.10)          | <.0001 |
| Alcohol            | vs. Prescription pain killers/opiates | 9.16 (8.29-10.12)         | <.0001 | 6.71 (6.07-7.42)          | <.0001 | 3.43 (3.07-3.83)          | <.0001 |
| Marijuana/cannabis | vs. Ecstasy/MDMA                      | 6.25 (5.69-6.86)          | <.0001 | 2.59 (2.37-2.82)          | <.0001 | 5.05 (4.48-5.70)          | <.0001 |
| Marijuana/cannabis | vs. Hallucinogens                     | 5.78 (5.29-6.32)          | <.0001 | 3.00 (2.73-3.29)          | <.0001 | 4.49 (4.01-5.03)          | <.0001 |
| Marijuana/cannabis | vs. Prescription pain killers/opiates | 3.79 (3.46-4.15)          | <.0001 | 1.25 (1.14-1.37)          | <.0001 | 2.17 (1.95-2.41)          | <.0001 |
| Ecstasy/MDMA       | vs. Hallucinogens                     | 0.93 (0.87-0.99)          | 0.0242 | 1.16 (1.09-1.24)          | <.0001 | 0.89 (0.82-0.97)          | 0.0064 |
| Ecstasy/MDMA       | vs. Prescription pain killers/opiates | 0.61 (0.55-0.66)          | <.0001 | 0.48 (0.44-0.53)          | <.0001 | 0.43 (0.38-0.48)          | <.0001 |
| Hallucinogens      | vs. Prescription pain killers/opiates | 0.66 (0.60-0.71)          | <.0001 | 0.42 (0.38-0.46)          | <.0001 | 0.48 (0.43-0.54)          | <.0001 |

<sup>a</sup>Estimates from differences in Least Squares Means from generalized estimating equations models that use a repeated measures approach, adjusting for age, sex, race/ethnicity.

**Supplemental Table S3: Estimates from separate logistic regression models (for each substance) for very/fairly easy access to each substance, comparing between countries, 2021<sub>Aug/Sept</sub>**

|                                   | CANADA vs US              |               | ENGLAND vs US             |               | ENGLAND vs CANADA         |               |
|-----------------------------------|---------------------------|---------------|---------------------------|---------------|---------------------------|---------------|
|                                   | AOR (95% CI) <sup>a</sup> | p             | AOR (95% CI) <sup>a</sup> | p             | AOR (95% CI) <sup>a</sup> | p             |
| Cigarettes                        | <b>1.95 (1.75-2.14)</b>   | <.0001        | <b>2.30 (2.05-2.58)</b>   | <.0001        | <b>1.18 (1.07-1.31)</b>   | <b>0.0011</b> |
| E-cigarettes                      | <b>1.38 (1.24-1.54)</b>   | <.0001        | <b>1.50 (1.33-1.68)</b>   | <.0001        | 1.08 (0.98-1.20)          | 0.1236        |
| Alcohol                           | <b>2.44 (2.18-2.73)</b>   | <.0001        | <b>2.23 (1.98-2.50)</b>   | <.0001        | 0.91 (0.82-1.02)          | 0.0943        |
| Marijuana/cannabis                | <b>1.59 (1.43-1.77)</b>   | <.0001        | <b>0.65 (0.58-0.73)</b>   | <.0001        | <b>0.41 (0.37-0.45)</b>   | <.0001        |
| Ecstasy/MDMA                      | <b>1.25 (1.08-1.46)</b>   | <b>0.0031</b> | <b>1.27 (1.09-1.49)</b>   | <b>0.0021</b> | 1.02 (0.89-1.16)          | 0.8199        |
| Hallucinogens                     | <b>1.20 (1.04-1.38)</b>   | <b>0.0130</b> | 0.97 (0.84-1.13)          | 0.7403        | <b>0.81 (0.71-0.93)</b>   | <b>0.0022</b> |
| Prescription pain killers/opiates | <b>0.82 (0.73-0.92)</b>   | <b>0.0009</b> | 1.12 (0.998-1.27)         | 0.0545        | <b>1.37 (1.23-1.53)</b>   | <.0001        |

<sup>a</sup>Estimates from contrasts between countries in logistic regression models adjusting for age, sex, race/ethnicity.

**Supplemental Table S4: Estimates from separate logistic regression models for very/fairly easy access to each substance (presented in Figure 2), contrasts between waves within countries, 2017-2021**

|                                           |                                           | CANADA                    |                          | ENGLAND                   |                    | US                        |                   |  |
|-------------------------------------------|-------------------------------------------|---------------------------|--------------------------|---------------------------|--------------------|---------------------------|-------------------|--|
|                                           |                                           | AOR (95% CI) <sup>a</sup> | p                        | AOR (95% CI) <sup>a</sup> | p                  | AOR (95% CI) <sup>a</sup> | p                 |  |
| <b>Cigarettes</b>                         | 2018 v 2017                               | <b>0.86 (0.77-0.96)</b>   | <b>0.008</b>             | <b>0.82 (0.73-0.93)</b>   | <b>0.002</b>       | <b>0.74 (0.66-0.83)</b>   | <b>&lt;0.0001</b> |  |
|                                           | 2019 v 2018                               | <b>0.73 (0.65-0.87)</b>   | <b>&lt;0.0001</b>        | <b>0.87 (0.77-0.98)</b>   | <b>0.03</b>        | 0.91 (0.81-1.02)          | 0.11              |  |
|                                           | 2020 <sub>Feb</sub> v 2019                | 0.97 (0.87-1.07)          | 0.55                     | 0.93 (0.83-1.04)          | 0.21               | <b>0.80 (0.71-0.89)</b>   | <b>0.0001</b>     |  |
|                                           | 2020 <sub>Aug</sub> v 2020 <sub>Feb</sub> | 1.03 (0.93-1.13)          | 0.58                     | 0.91 (0.82-1.01)          | 0.07               | <b>0.72 (0.65-0.80)</b>   | <b>&lt;0.0001</b> |  |
|                                           | 2021 <sub>Feb</sub> v 2020 <sub>Aug</sub> | 0.96 (0.87-1.05)          | 0.34                     | 0.98 (0.88-1.09)          | 0.69               | <b>0.85 (0.77-0.95)</b>   | <b>0.003</b>      |  |
|                                           | 2021 <sub>Aug</sub> v 2021 <sub>Feb</sub> | 1.01 (0.92-1.11)          | 0.90                     | 0.96 (0.86-1.07)          | 0.43               | 1.01 (0.89-1.13)          | 0.92              |  |
|                                           | <b>Interaction</b>                        | <b>CA vs. US</b>          |                          |                           | <b>EN vs US</b>    |                           |                   |  |
|                                           | 2020 <sub>Feb</sub> v 2019 <sub>Aug</sub> | <b>1.22 (1.04-1.22)</b>   | <b>p=0.01</b>            | 1.17 (0.99-1.37)          | p=0.06             |                           |                   |  |
|                                           | 2020 <sub>Aug</sub> v 2019 <sub>Aug</sub> | <b>1.74 (1.50-2.02)</b>   | <b>p&lt;0.0001</b>       | <b>1.48 (1.26-1.73)</b>   | <b>p&lt;0.0001</b> |                           |                   |  |
|                                           | 2021 <sub>Feb</sub> v 2019 <sub>Aug</sub> | <b>1.95 (1.68-2.28)</b>   | <b>p&lt;0.0001</b>       | <b>1.70 (1.44-2.00)</b>   | <b>p&lt;0.0001</b> |                           |                   |  |
| 2021 <sub>Aug</sub> v 2019 <sub>Aug</sub> | <b>1.96 (1.67-2.29)</b>                   | <b>p&lt;0.0001</b>        | <b>1.62 (1.37-1.91)</b>  | <b>p&lt;0.0001</b>        |                    |                           |                   |  |
| <b>E-cigarettes</b>                       | 2018 v 2017                               | 0.98 (0.88-1.09)          | 0.72                     | <b>0.86 (0.76-0.97)</b>   | <b>0.01</b>        | <b>0.88 (0.79-0.98)</b>   | <b>0.03</b>       |  |
|                                           | 2019 v 2018                               | 1.06 (0.95-1.18)          | 0.31                     | 0.90 (0.79-1.02)          | 0.11               | 1.13 (0.997-1.27)         | 0.055             |  |
|                                           | 2020 <sub>Feb</sub> v 2019                | 0.98 (0.88-1.10)          | 0.78                     | 0.93 (0.83-1.05)          | 0.25               | <b>0.87 (0.77-0.98)</b>   | <b>0.02</b>       |  |
|                                           | 2020 <sub>Aug</sub> v 2020 <sub>Feb</sub> | <b>0.87 (0.78-0.96)</b>   | <b>0.01</b>              | <b>0.78 (0.70-0.87)</b>   | <b>&lt;0.0001</b>  | <b>0.73 (0.66-0.82)</b>   | <b>&lt;0.0001</b> |  |
|                                           | 2021 <sub>Feb</sub> v 2020 <sub>Aug</sub> | 0.96 (0.87-1.06)          | 0.44                     | 1.06 (0.95-1.17)          | 0.32               | <b>0.84 (0.75-0.93)</b>   | <b>0.0009</b>     |  |
|                                           | 2021 <sub>Aug</sub> v 2021 <sub>Feb</sub> | <b>0.90 (0.82-0.995)</b>  | <b>0.04</b>              | 0.99 (0.89-1.10)          | 0.81               | 1.12 (0.996-1.26)         | 0.06              |  |
|                                           | <b>Interaction</b>                        | <b>CA vs. US</b>          |                          |                           | <b>EN vs US</b>    |                           |                   |  |
|                                           | 2020 <sub>Feb</sub> v 2019 <sub>Aug</sub> | <b>1.14 (0.96-1.34)</b>   | <b>p=0.13</b>            | <b>1.08 (0.91-1.28)</b>   | <b>p=0.39</b>      |                           |                   |  |
|                                           | 2020 <sub>Aug</sub> v 2019 <sub>Aug</sub> | <b>1.34 (1.15-1.57)</b>   | <b>p=0.0002</b>          | <b>1.15 (0.98-1.35)</b>   | <b>p=0.09</b>      |                           |                   |  |
|                                           | 2021 <sub>Feb</sub> v 2019 <sub>Aug</sub> | <b>1.54 (1.31-1.81)</b>   | <b>p&lt;0.0001</b>       | <b>1.45 (1.23-1.71)</b>   | <b>p&lt;0.0001</b> |                           |                   |  |
| 2021 <sub>Aug</sub> v 2019 <sub>Aug</sub> | <b>1.24 (1.05-1.46)</b>                   | <b>p=0.009</b>            | <b>1.28 (1.08-1.52)</b>  | <b>p=0.005</b>            |                    |                           |                   |  |
| <b>Marijuana/<br/>cannabis</b>            | 2018 v 2017                               | 0.94 (0.86-1.04)          | 0.25                     | 1.06 (0.96-1.17)          | 0.27               | <b>0.87 (0.79-0.96)</b>   | <b>0.007</b>      |  |
|                                           | 2019 v 2018                               | <b>1.17 (1.06-1.29)</b>   | <b>0.002</b>             | 0.92 (0.83-1.03)          | 0.14               | <b>1.14 (1.02-1.27)</b>   | <b>0.02</b>       |  |
|                                           | 2020 <sub>Feb</sub> v 2019                | 1.09 (0.99-1.21)          | 0.08                     | <b>1.18 (1.06-1.31)</b>   | <b>0.002</b>       | <b>1.17 (1.04-1.30)</b>   | <b>0.006</b>      |  |
|                                           | 2020 <sub>Aug</sub> v 2020 <sub>Feb</sub> | <b>0.90 (0.82-0.99)</b>   | <b>0.03</b>              | <b>0.78 (0.71-0.86)</b>   | <b>&lt;0.0001</b>  | <b>0.69 (0.63-0.76)</b>   | <b>&lt;0.0001</b> |  |
|                                           | 2021 <sub>Feb</sub> v 2020 <sub>Aug</sub> | 0.95 (0.87-1.04)          | 0.30                     | <b>1.12 (1.02-1.24)</b>   | <b>0.02</b>        | <b>0.88 (0.80-0.98)</b>   | <b>0.02</b>       |  |
|                                           | 2021 <sub>Aug</sub> v 2021 <sub>Feb</sub> | 0.96 (0.88-1.05)          | 0.38                     | <b>0.81 (0.73-0.89)</b>   | <b>&lt;0.0001</b>  | 0.98 (0.87-1.09)          | 0.66              |  |
|                                           | <b>Interaction</b>                        | <b>US vs CA</b>           |                          |                           | <b>EN vs CA</b>    |                           |                   |  |
|                                           | 2019 <sub>Aug</sub> v 2018 <sub>Aug</sub> | 0.97 (0.84-1.13)          | p=0.72                   | <b>0.79 (0.68-0.91)</b>   | <b>p=0.001</b>     |                           |                   |  |
|                                           | 2020 <sub>Feb</sub> v 2018 <sub>Aug</sub> | 1.04 (0.90-1.20)          | p=0.60                   | <b>0.85 (0.74-0.98)</b>   | <b>p=0.03</b>      |                           |                   |  |
|                                           | 2020 <sub>Aug</sub> v 2018 <sub>Aug</sub> | <b>0.80 (0.70-0.92)</b>   | <b>p=0.001</b>           | <b>0.74 (0.64-0.85)</b>   | <b>p&lt;0.0001</b> |                           |                   |  |
| 2021 <sub>Feb</sub> v 2018 <sub>Aug</sub> | <b>0.74 (0.64-0.85)</b>                   | <b>p&lt;0.0001</b>        | <b>0.87 (0.76-0.998)</b> | <b>p=0.048</b>            |                    |                           |                   |  |
| 2021 <sub>Aug</sub> v 2018 <sub>Aug</sub> | <b>0.75 (0.65-0.87)</b>                   | <b>p=0.0001</b>           | <b>0.73 (0.63-0.84)</b>  | <b>p&lt;0.0001</b>        |                    |                           |                   |  |
| <b>Alcohol</b>                            | 2018 v 2017                               | <b>0.79 (0.70-0.89)</b>   | <b>0.0001</b>            | 0.95 (0.83-1.09)          | 0.45               | <b>0.89 (0.80-0.99)</b>   | <b>0.04</b>       |  |
|                                           | 2019 v 2018                               | <b>0.80 (0.72-0.90)</b>   | <b>0.0001</b>            | <b>0.76 (0.66-0.87)</b>   | <b>&lt;0.0001</b>  | 0.91 (0.81-1.02)          | 0.11              |  |
|                                           | 2020 <sub>Feb</sub> v 2019                | 1.07 (0.95-1.19)          | 0.27                     | <b>0.85 (0.76-0.96)</b>   | <b>0.01</b>        | <b>1.19 (1.06-1.33)</b>   | <b>0.003</b>      |  |
|                                           | 2020 <sub>Aug</sub> v 2020 <sub>Feb</sub> | 0.98 (0.88-1.09)          | 0.76                     | 0.97 (0.87-1.09)          | 0.62               | <b>0.87 (0.78-0.97)</b>   | <b>0.009</b>      |  |
|                                           | 2021 <sub>Feb</sub> v 2020 <sub>Aug</sub> | 1.02 (0.92-1.13)          | 0.71                     | 0.98 (0.88-1.10)          | 0.73               | 0.91 (0.82-1.02)          | 0.09              |  |
|                                           | 2021 <sub>Aug</sub> v 2021 <sub>Feb</sub> | 0.995 (0.90-1.10)         | 0.92                     | 0.92 (0.83-1.03)          | 0.16               | 0.97 (0.86-1.09)          | 0.63              |  |

<sup>a</sup>Estimates from contrasts between countries in logistic regression models adjusting for age, sex, race/ethnicity.

**Supplemental Table S5: Estimates from separate logistic regression models for very/fairly easy access to each substance, from within-country models for the US, 2017-2021 (pooled)**

|                               | Contrast                   | Cigarettes                |                  | E-cigarettes              |                  | Cannabis                             |                                          |
|-------------------------------|----------------------------|---------------------------|------------------|---------------------------|------------------|--------------------------------------|------------------------------------------|
|                               |                            | AOR (95% CI) <sup>a</sup> | p                | AOR (95% CI) <sup>a</sup> | p                | AOR (95% CI) <sup>a</sup>            | p                                        |
| <b>Base model<sup>9</sup></b> | T21 not implemented        | ref                       |                  | ref                       |                  | Not legal                            | ref                                      |
|                               | T21 <1yr                   | <b>0.57 (0.53-0.61)</b>   | <b>&lt;.0001</b> | <b>0.74 (0.69-0.80)</b>   | <b>&lt;.0001</b> | Medical legal                        | <b>1.12 (1.05-1.20)</b> <b>&lt;.0001</b> |
|                               | T21 1-2 yrs                | <b>0.45 (0.42-0.48)</b>   | <b>&lt;.0001</b> | <b>0.64 (0.59-0.69)</b>   | <b>&lt;.0001</b> | Medical + non-medical (MLA 21) legal | <b>1.37 (1.27-1.48)</b> <b>&lt;.0001</b> |
|                               | T21 3+ yrs                 | <b>0.44 (0.39-0.50)</b>   | <b>&lt;.0001</b> | <b>0.67 (0.60-0.76)</b>   | <b>&lt;.0001</b> | Both vs med only                     | <b>1.22 (1.14-1.31)</b> <b>&lt;.0001</b> |
| <b>Interaction:</b>           | <b>Simple effects</b>      |                           |                  |                           |                  |                                      | p=0.39                                   |
| <b>T21 by age</b>             | age 16 : <1 year vs not    | <b>0.72 (0.63-0.83)</b>   | <b>&lt;.0001</b> | 0.92 (0.80-1.06)          | 0.24             | --                                   | --                                       |
|                               | age 16 : 1-2 years vs not  | <b>0.51 (0.44-0.59)</b>   | <b>&lt;.0001</b> | <b>0.72 (0.63-0.84)</b>   | <b>&lt;.0001</b> | --                                   | --                                       |
|                               | age 16 : 3+ years vs not   | <b>0.49 (0.38-0.62)</b>   | <b>&lt;.0001</b> | 0.87 (0.68-1.10)          | 0.24             | --                                   | --                                       |
|                               | age 17 : <1 year vs not    | <b>0.70 (0.61-0.80)</b>   | <b>&lt;.0001</b> | 0.93 (0.81-1.07)          | 0.33             | --                                   | --                                       |
|                               | age 17 : 1-2 years vs not  | <b>0.54 (0.47-0.61)</b>   | <b>&lt;.0001</b> | <b>0.79 (0.69-0.91)</b>   | <b>0.0008</b>    | --                                   | --                                       |
|                               | age 17 : 3+ years vs not   | <b>0.60 (0.48-0.75)</b>   | <b>&lt;.0001</b> | 0.88 (0.70-1.11)          | 0.29             | --                                   | --                                       |
|                               | age 18 : <1 year vs not    | <b>0.44 (0.38-0.51)</b>   | <b>&lt;.0001</b> | <b>0.55 (0.47-0.64)</b>   | <b>&lt;.0001</b> | --                                   | --                                       |
|                               | age 18 : 1-2 years vs not  | <b>0.37 (0.32-0.43)</b>   | <b>&lt;.0001</b> | <b>0.52 (0.45-0.60)</b>   | <b>&lt;.0001</b> | --                                   | --                                       |
|                               | age 18 : 3+ years vs not   | <b>0.38 (0.30-0.77)</b>   | <b>&lt;.0001</b> | <b>0.50 (0.39-0.62)</b>   | <b>&lt;.0001</b> | --                                   | --                                       |
|                               | age 19 : <1 year vs not    | <b>0.46 (0.39-0.55)</b>   | <b>&lt;.0001</b> | <b>0.60 (0.50-0.72)</b>   | <b>&lt;.0001</b> | --                                   | --                                       |
|                               | age 19 : 1-2 years vs not  | <b>0.38 (0.32-0.45)</b>   | <b>&lt;.0001</b> | <b>0.52 (0.43-0.62)</b>   | <b>&lt;.0001</b> | --                                   | --                                       |
|                               | age 19 : 3+ years vs not   | <b>0.33 (0.25-0.42)</b>   | <b>&lt;.0001</b> | <b>0.51 (0.39-0.67)</b>   | <b>&lt;.0001</b> | --                                   | --                                       |
|                               | <b>Interaction effects</b> |                           |                  |                           |                  | --                                   | --                                       |
|                               | diff by <1 year vs not:    | <b>0.50 (0.41-0.61)</b>   | <b>&lt;.0001</b> | 0.86 (0.70-1.04)          | 0.13             | --                                   | --                                       |
|                               | age 17 vs 16               |                           |                  |                           |                  | --                                   | --                                       |
|                               | diff by 1-2 years vs not:  | <b>0.27 (0.22-0.33)</b>   | <b>&lt;.0001</b> | <b>0.57 (0.47-0.70)</b>   | <b>&lt;.0001</b> | --                                   | --                                       |
|                               | age 17 vs 16               |                           |                  |                           |                  | --                                   | --                                       |
|                               | diff by 3+ years vs not:   | <b>0.29 (0.21-0.41)</b>   | <b>&lt;.0001</b> | 0.77 (0.55-1.07)          | 0.12             | --                                   | --                                       |
|                               | age 17 vs 16               |                           |                  |                           |                  | --                                   | --                                       |
|                               | diff by <1 year vs not:    | <b>0.31 (0.26-0.38)</b>   | <b>&lt;.0001</b> | <b>0.50 (0.41-0.62)</b>   | <b>&lt;.0001</b> | --                                   | --                                       |
|                               | age 18 vs 16               |                           |                  |                           |                  | --                                   | --                                       |
|                               | diff by 1-2 years vs not:  | <b>0.19 (0.15-0.23)</b>   | <b>&lt;.0001</b> | <b>0.37 (0.30-0.46)</b>   | <b>&lt;.0001</b> | --                                   | --                                       |
|                               | age 18 vs 16               |                           |                  |                           |                  | --                                   | --                                       |
|                               | diff by 3+ years vs not:   | <b>0.18 (0.13-0.26)</b>   | <b>&lt;.0001</b> | <b>0.43 (0.31-0.60)</b>   | <b>&lt;.0001</b> | --                                   | --                                       |
|                               | age 18 vs 16               |                           |                  |                           |                  | --                                   | --                                       |
|                               | diff by <1 year vs not:    | <b>0.33 (0.27-0.41)</b>   | <b>&lt;.0001</b> | <b>0.55 (0.44-0.69)</b>   | <b>&lt;.0001</b> | --                                   | --                                       |
|                               | age 19 vs 16               |                           |                  |                           |                  | --                                   | --                                       |
|                               | diff by 1-2 years vs not:  | <b>0.20 (0.16-0.24)</b>   | <b>&lt;.0001</b> | <b>0.37 (0.30-0.47)</b>   | <b>&lt;.0001</b> | --                                   | --                                       |
|                               | age 19 vs 16               |                           |                  |                           |                  | --                                   | --                                       |
|                               | diff by 3+ years vs not:   | <b>0.16 (0.11-0.23)</b>   | <b>&lt;.0001</b> | <b>0.44 (0.31-0.64)</b>   | <b>&lt;.0001</b> | --                                   | --                                       |
|                               | age 19 vs 16               |                           |                  |                           |                  | --                                   | --                                       |
| <b>Base model w/ state</b>    | T21 not implemented        | ref                       |                  | ref                       |                  | Not legal                            | ref <b>p&lt;0.0001</b>                   |

|                      |                     |                         |                    |                         |                    |                                      |                         |                    |
|----------------------|---------------------|-------------------------|--------------------|-------------------------|--------------------|--------------------------------------|-------------------------|--------------------|
|                      | T21 <1yr            | <b>0.57 (0.53-0.61)</b> | <b>&lt;.0001</b>   | <b>0.74 (0.69-0.80)</b> | <b>&lt;.0001</b>   | Medical legal                        | 0.85 (0.69-1.04)        | 0.12               |
|                      | T21 1-2 yrs         | <b>0.42 (0.39-0.45)</b> | <b>&lt;.0001</b>   | <b>0.61 (0.56-0.66)</b> | <b>&lt;.0001</b>   | Medical + non-medical (MLA 21) legal | <b>0.72 (0.57-0.92)</b> | <b>0.008</b>       |
|                      | T21 3+ yrs          | <b>0.24 (0.20-0.29)</b> | <b>&lt;.0001</b>   | <b>0.43 (0.36-0.53)</b> | <b>&lt;.0001</b>   | Both vs med only                     | <b>0.85 (0.74-0.98)</b> | <b>0.02</b>        |
| <b>Base model +</b>  | months              | <b>b=-0.02</b>          | <b>p&lt;0.0001</b> | <b>b=-0.01</b>          | <b>p&lt;0.0001</b> | months                               | <b>b=-0.009</b>         | <b>p&lt;0.0001</b> |
| <b>calendar time</b> |                     |                         |                    |                         |                    |                                      |                         |                    |
| (months)             |                     |                         |                    |                         |                    |                                      |                         |                    |
|                      | T21                 | -                       | <b>p&lt;0.0001</b> | -                       | p=0.11             | Cannabis legalization                | -                       | <b>p&lt;0.0001</b> |
|                      | T21 not implemented | ref                     |                    | ref                     |                    | Not legal                            | ref                     |                    |
|                      | T21 <1yr            | <b>0.84 (0.76-0.93)</b> | <b>&lt;.0001</b>   | 0.92 (0.83-1.02)        | 0.11               | Medical legal                        | 1.12 (1.05-1.20)        | <b>0.0006</b>      |
|                      | T21 1-2 yrs         | <b>0.77 (0.69-0.87)</b> | <b>&lt;.0001</b>   | <b>0.86 (0.77-0.97)</b> | <b>0.01</b>        | Medical + non-medical (MLA 21) legal | 1.43 (1.32-1.54)        | <b>0.0001</b>      |
|                      | T21 3+ yrs          | <b>0.73 (0.63-0.85)</b> | <b>&lt;.0001</b>   | 0.89 (0.77-1.03)        | 0.13               | Both vs med only                     | 1.27 (1.18-1.37)        | <b>0.0001</b>      |

<sup>a</sup>Estimates from contrasts between countries in logistic regression models adjusting for age, sex, and race/ethnicity.

**Supplemental Table S6: Estimates from separate logistic regression models for very/fairly easy access to each substance, from within-country models for Canada, 2017-2021 (pooled)**

|                                    | Contrast                              | Cigarettes                |                    | E-cigarettes              |                    | Contrast                                 | Cannabis                  |                    |
|------------------------------------|---------------------------------------|---------------------------|--------------------|---------------------------|--------------------|------------------------------------------|---------------------------|--------------------|
|                                    |                                       | AOR (95% CI) <sup>a</sup> | p                  | AOR (95% CI) <sup>a</sup> | p                  |                                          | AOR (95% CI) <sup>a</sup> | p                  |
| <b>Base model<sup>a</sup></b>      | Not legal                             |                           |                    |                           |                    | Not legal                                | ref                       |                    |
|                                    | MLA 18                                | ref                       |                    | ref                       |                    | MLA 18                                   | <b>1.20 (1.10-1.32)</b>   | <b>&lt;0.0001</b>  |
|                                    | MLA 19                                | <b>0.84 (0.79-0.89)</b>   | <b>p&lt;0.0001</b> | 1.00 (0.94-1.06)          | p=0.95             | MLA 19                                   | <b>1.18 (1.11-1.26)</b>   | <b>&lt;0.0001</b>  |
|                                    | MLA 21                                |                           |                    |                           |                    | MLA 21                                   | <b>0.78 (0.72-0.86)</b>   | <b>&lt;0.0001</b>  |
| <b>Interaction:<br/>MLA by age</b> | <b>Simple effects</b>                 |                           | <b>p&lt;0.0001</b> |                           | <b>p&lt;0.0001</b> |                                          |                           | <b>p&lt;0.0001</b> |
|                                    | age 16 : MLA 19 vs 18                 | 1.10 (0.99-1.23)          | 0.12               | <b>1.13 (1.01-1.27)</b>   | <b>0.04</b>        | age 16 : 18 vs not legal                 | 0.87 (0.71-1.06)          | 0.16               |
|                                    | age 17 : MLA 19 vs 18                 | 0.93 (0.84-1.04)          | 0.19               | <b>1.12 (1.004-1.25)</b>  | <b>0.04</b>        | age 16 : 19 vs not legal                 | 0.93 (0.81-1.07)          | 0.32               |
|                                    | age 18 : MLA 19 vs 18                 | <b>0.55 (0.49-0.61)</b>   | <b>&lt;.0001</b>   | <b>0.79 (0.70-0.88)</b>   | <b>&lt;.0001</b>   | age 16 : 21 vs not legal                 | <b>0.51 (0.42-0.62)</b>   | <b>&lt;.0001</b>   |
|                                    | age 19 : MLA 19 vs 18                 | 0.92 (0.81-1.06)          | 0.27               | 1.00 (0.87-1.14)          | 0.99               | age 17 : 18 vs not legal                 | 0.92 (0.77-1.11)          | 0.38               |
|                                    |                                       |                           |                    |                           |                    | age 17 : 19 vs not legal                 | 0.97 (0.86-1.10)          | 0.63               |
|                                    |                                       |                           |                    |                           |                    | age 17 : 21 vs not legal                 | <b>0.62 (0.53-0.74)</b>   | <b>&lt;.0001</b>   |
|                                    |                                       |                           |                    |                           |                    | age 18 : 18 vs not legal                 | <b>1.59 (1.35-1.88)</b>   | <b>&lt;.0001</b>   |
|                                    |                                       |                           |                    |                           |                    | age 18 : 19 vs not legal                 | <b>1.24 (1.11-1.39)</b>   | <b>0.0001</b>      |
|                                    |                                       |                           |                    |                           |                    | age 18 : 21 vs not legal                 | 1.03 (0.87-1.21)          | 0.72               |
|                                    |                                       |                           |                    |                           |                    | age 19 : 18 vs not legal                 | <b>1.58 (1.30-1.92)</b>   | <b>&lt;.0001</b>   |
|                                    |                                       |                           |                    |                           |                    | age 19 : 19 vs not legal                 | <b>1.73 (1.53-1.96)</b>   | <b>&lt;.0001</b>   |
|                                    |                                       |                           |                    |                           |                    | age 19 : 21 vs not legal                 | 1.06 (0.88-1.29)          | 0.52               |
|                                    | <b>Interaction effects</b>            |                           |                    |                           |                    |                                          |                           |                    |
|                                    | diff by MLA 19 vs 18:<br>age 16 vs 18 | <b>0.60 (0.52-0.71)</b>   | <b>&lt;.0001</b>   | 0.89 (0.76-1.04)          | 0.15               | diff by 18 vs not legal:<br>age 17 vs 16 | 0.80 (0.61-1.05)          | 0.10               |
|                                    | diff by MLA 19 vs 18:<br>age 17 vs 18 | <b>0.51 (0.44-0.59)</b>   | <b>&lt;.0001</b>   | 0.88 (0.75-1.03)          | 0.12               | diff by 19 vs not legal:<br>age 17 vs 16 | 0.90 (0.75-1.09)          | 0.29               |
|                                    | diff by MLA 19 vs 18:<br>age 19 vs 18 | <b>0.50 (0.42-0.60)</b>   | <b>&lt;.0001</b>   | <b>0.79 (0.66-0.94)</b>   | <b>0.008</b>       | diff by 21 vs not legal:<br>age 17 vs 16 | <b>0.32 (0.25-0.41)</b>   | <b>&lt;.0001</b>   |
|                                    |                                       |                           |                    |                           |                    | diff by 18 vs not legal:<br>age 18 vs 16 | <b>1.38 (1.07-1.79)</b>   | <b>0.01</b>        |
|                                    |                                       |                           |                    |                           |                    | diff by 19 vs not legal:<br>age 18 vs 16 | 1.16 (0.97-1.38)          | 0.11               |
|                                    |                                       |                           |                    |                           |                    | diff by 21 vs not legal:<br>age 18 vs 16 | <b>0.53 (0.41-0.68)</b>   | <b>&lt;.0001</b>   |
|                                    |                                       |                           |                    |                           |                    | diff by 18 vs not legal:<br>age 19 vs 16 | <b>1.37 (1.03-1.81)</b>   | <b>0.03</b>        |



|                     |             |                         |                    |                  |                    |                                          |                         |                  |
|---------------------|-------------|-------------------------|--------------------|------------------|--------------------|------------------------------------------|-------------------------|------------------|
|                     |             |                         |                    |                  |                    | diff by 19 vs not legal:<br>age 19 vs 16 | <b>1.62 (1.34-1.95)</b> | <b>&lt;.0001</b> |
|                     |             |                         |                    |                  |                    | diff by 21 vs not legal:<br>age 19 vs 16 | <b>0.55 (0.42-0.71)</b> | <b>&lt;.0001</b> |
| <b>Base model +</b> | Months      | <b>b=-0.01</b>          | <b>p&lt;0.0001</b> | <b>b=-0.005</b>  | <b>p&lt;0.0001</b> | Months                                   |                         | p=0.069          |
| <b>months since</b> |             |                         |                    |                  |                    |                                          |                         |                  |
| <b>policy</b>       | MLA 19 v 18 | <b>0.84 (0.79-0.88)</b> | <b>p&lt;0.0001</b> | 1.00 (0.94-1.06) | p=0.93             | MLA 18 vs restricted                     | <b>1.31 (1.15-1.50)</b> | <b>&lt;.0001</b> |
|                     |             |                         |                    |                  |                    | MLA 19 vs restricted                     | <b>1.30 (1.15-1.46)</b> | <b>&lt;.0001</b> |
|                     |             |                         |                    |                  |                    | MLA 21 vs restricted                     | 0.87 (0.75-1.01)        | 0.06             |
| Add months          | Months*MLA  | --                      |                    | b=0.003          | p=0.25             |                                          | --                      |                  |
| *MLA                |             |                         |                    |                  |                    |                                          |                         |                  |
| interaction         | Months      | --                      |                    | <b>b=-0.008</b>  | <b>p&lt;0.0001</b> |                                          | --                      |                  |
|                     | MLA 19 v 18 | --                      |                    | b=-0.06          | p=0.32             |                                          | --                      |                  |

<sup>a</sup>Estimates from contrasts between countries in logistic regression models adjusting for age, sex, and race/ethnicity.

Supplemental Figure S1: Perceived ease of accessing illicit substances among youth aged 16-19, by country, 2017-2021

CANADA ENGLAND US

A. PRESCRIPTION PAINKILLERS/OPIATES

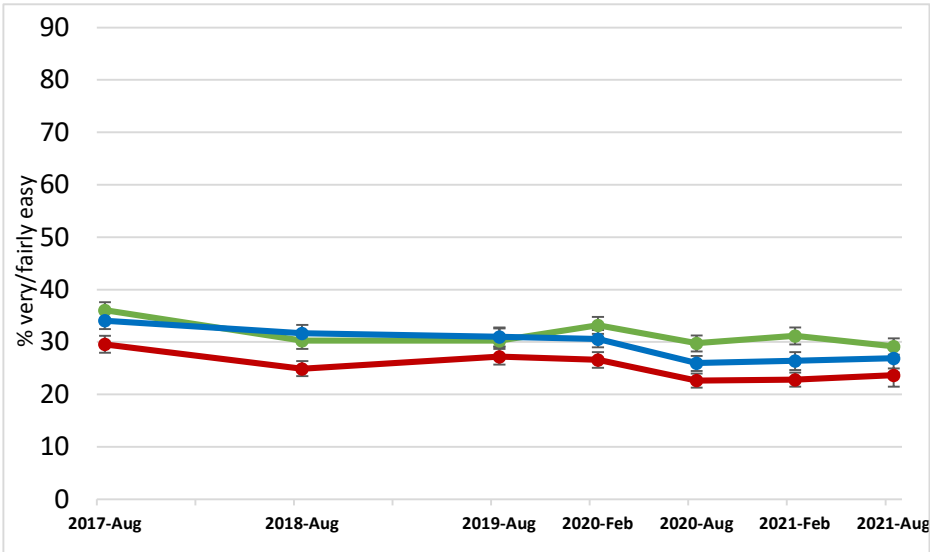

B. ECSTASY/MDMA

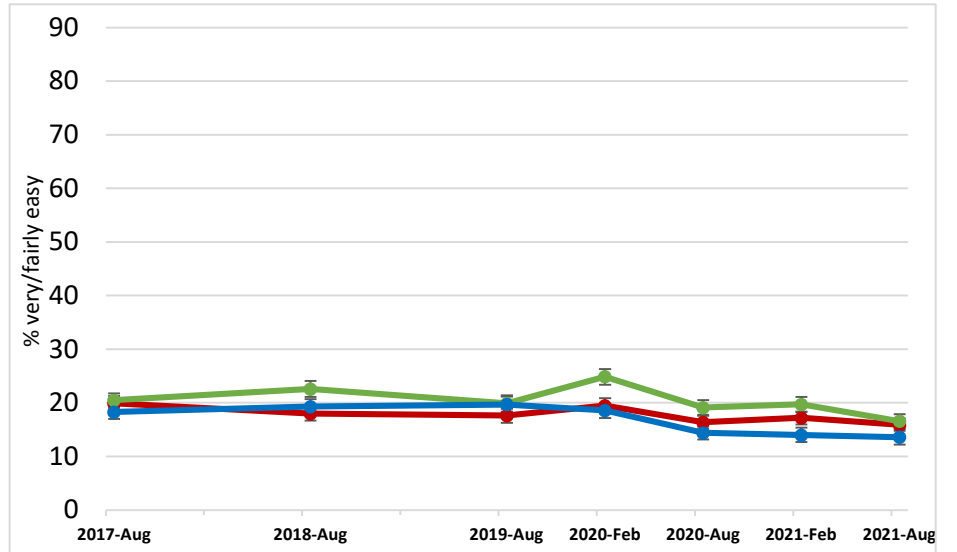

C. HALLUCINOGENS

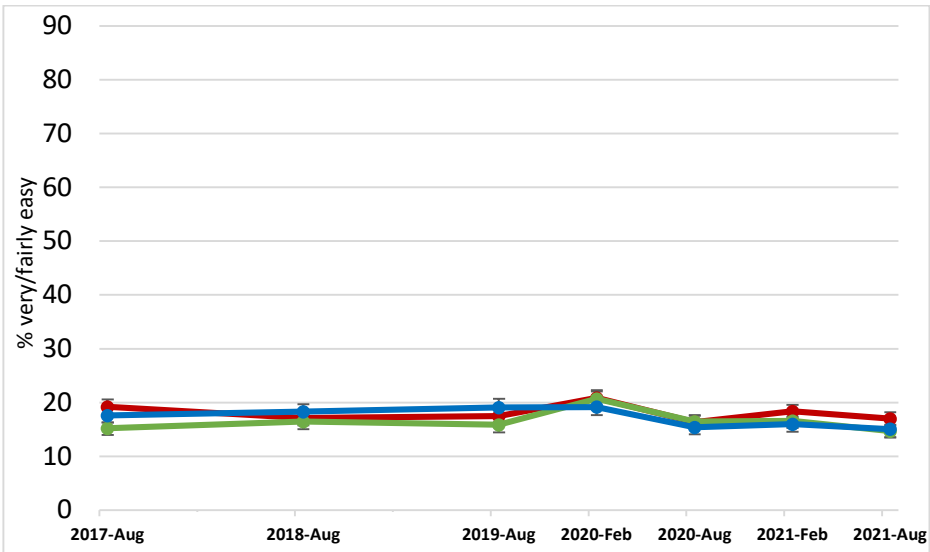

Supplemental Figure S2: Perceived ease of accessing substances among youth aged 16-19, by user status and by country, 2017-2021 (N=91,647)

● Canada - Past 30D user   
 ● England - Past 30D user   
 ● US - Past 30D user   
 -●- Canada - Else   
 -●- England - Else   
 -●- US - Else

**A. CIGARETTES**

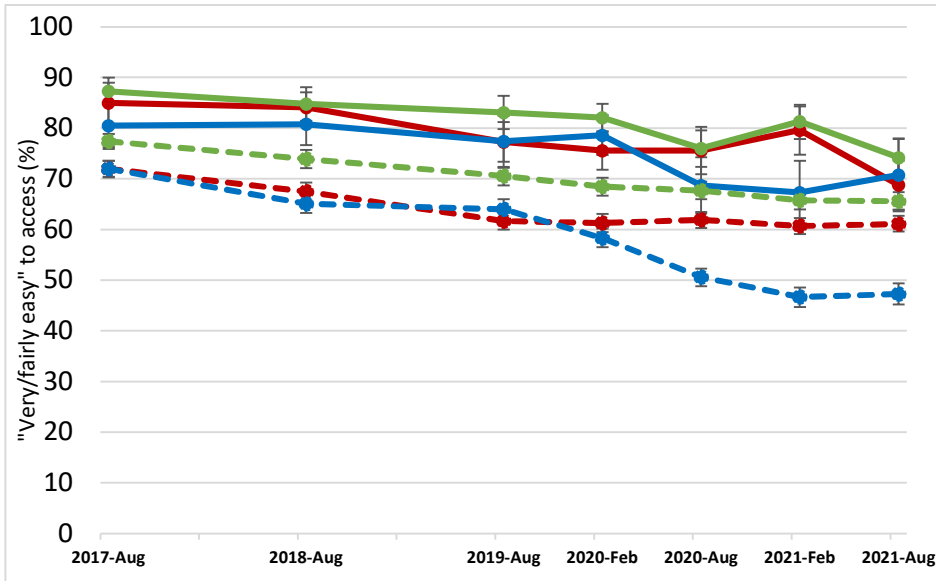

**B. E-CIGARETTES**

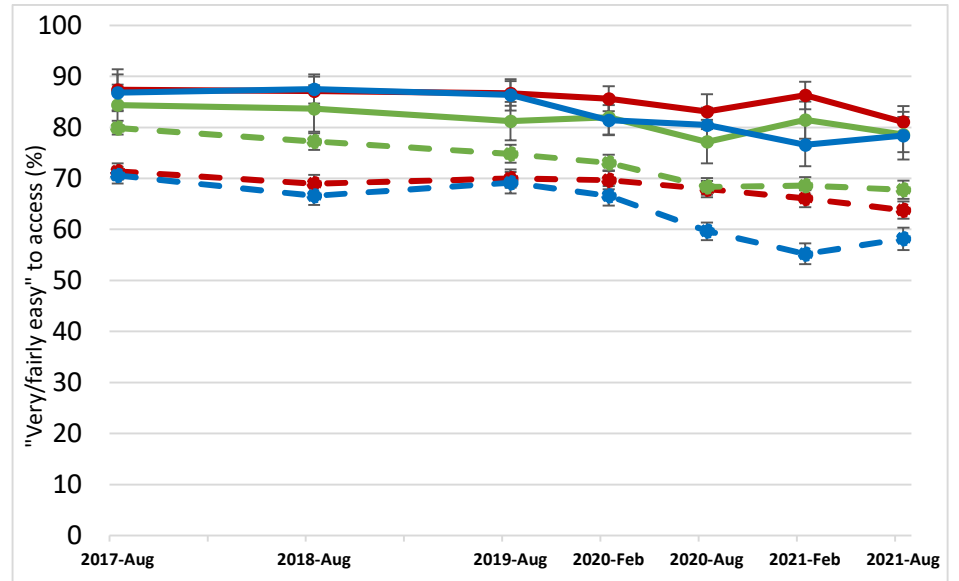

**C. CANNABIS**

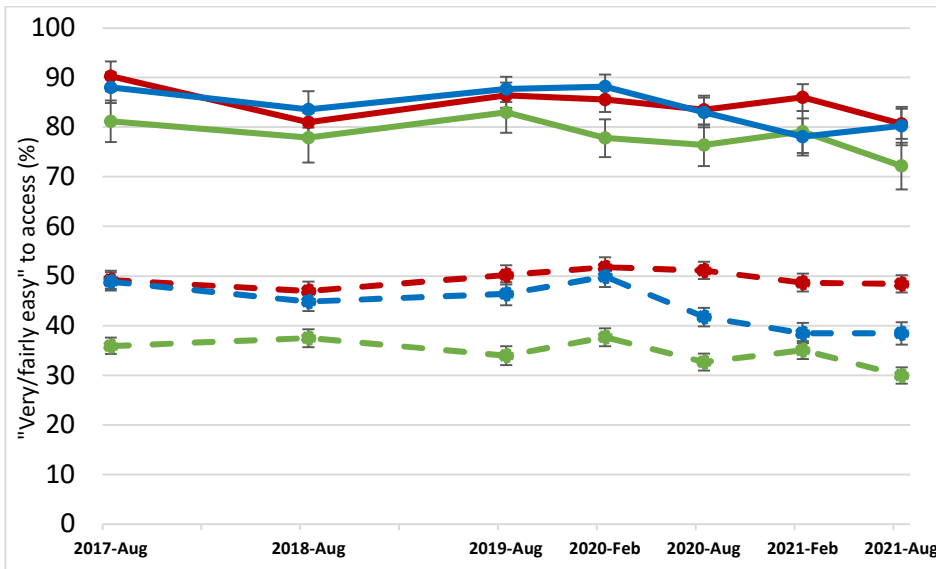

### **Perceived ease of access by substance use status**

Supplemental Figure S2 shows perceived ease of accessing tobacco products and cannabis among youth in each country, by their status as a past 30-day user or not (including non-users, former users, and those who may not have indicated last use).

#### *Cigarettes*

Comparing past 30-day smokers to others, smokers perceived greater ease accessing cigarettes in each country ( $p < 0.001$ ). When tested in a model with a two-way interaction term for past 30-day smoking by wave, there was no significant interaction in England ( $p = 0.06$ ) or the US ( $p = 0.07$ ), but there was in Canada ( $p = 0.04$ ). Trends in perceived ease of accessing cigarettes were similar among past 30-day smokers and other respondents, but diverged between February and August of 2021 in Canada, whereby past 30-day smokers perceived a decrease in ease of getting cigarettes while others did not (aOR=0.59, 95%CI 0.41-0.84,  $p = 0.004$ ).

#### *E-cigarettes*

For e-cigarettes, past 30-day vapers in all three countries perceived greater ease of access ( $p < 0.001$ ) than others. There was a no significant interaction between past 30-day e-cigarette use and wave in Canada ( $p = 0.66$ ) or England ( $p = 0.19$ ), indicating that patterns over time were similar among both past 30-day e-cigarette users and others. However, there was a significant interaction in the US ( $p = 0.02$ ), such that between August 2019 and February 2020 (i.e., the time period including federal implementation of T21), e-cigarette users perceived a greater decrease than others in access to e-cigarettes (aOR=0.66, 95%CI 0.51-0.87,  $p = 0.003$ ).

#### *Cannabis*

Past 30-day cannabis users perceived much greater ease of accessing cannabis, in all countries ( $p < 0.001$ ). The interaction between past 30-day cannabis use and wave was significant only in Canada ( $p < 0.001$ ): perceived ease of access decreased more among users during the pre-legalization period between 2017 and 2018 (aOR=0.48, 95%CI 0.33-0.70,  $p < 0.001$ ), and between February and August of 2021 (aOR=0.64, 95%CI 0.49-0.85,  $p = 0.002$ ). There was a no significant interaction in England ( $p = 0.29$ ) or the US ( $p = 0.48$ ).
